# Supplementary material for: Palbociclib Rechallenge for Hormone Receptor–Positive/HER-Negative Advanced Breast Cancer: Findings from the Phase II BioPER Trial
Source: Oxford University Press journal article supplement (doi:10.1158/1078-0432.ccr-22-1281), 2022-09-27
Supplement: ccr-22-1281_supplementary_figure_s2_supps2.docx [file ccr-22-1281_supplementary_figure_s2_supps2.docx]

## Supplementary Figure S2. Summary of all adverse events according to NCI-CTCAE version 4.0.3.


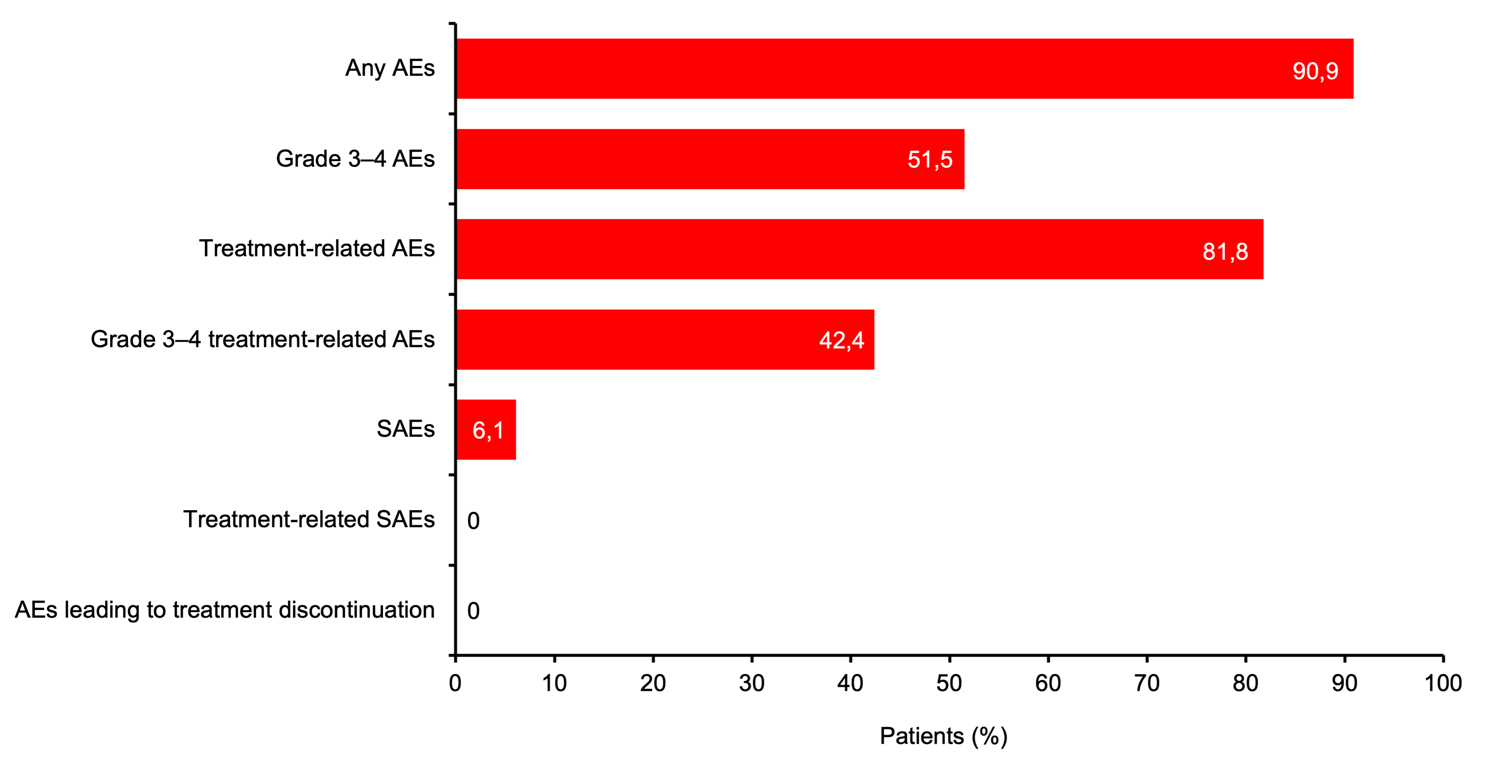


Abbreviations: AE, Adverse events; NCI-CTCAE, National Cancer Institute-Common Terminology Criteria for Adverse Events; SAE, Serious adverse events
