# Supplementary material for: Rolling resistance of pneumatic tires. Interim report, May--Jul 1974
Source: Oxford University Press journal article supplement (doi:10.1158/1078-0432.ccr-22-1281), 1975-05-01
Supplement: ccr-22-1281_supplementary_figure_s3_supps3.docx [file ccr-22-1281_supplementary_figure_s3_supps3.docx]

## Supplementary Figure S3. The level of mutant and wild-type circulating DNA in baseline plasma samples by patient.


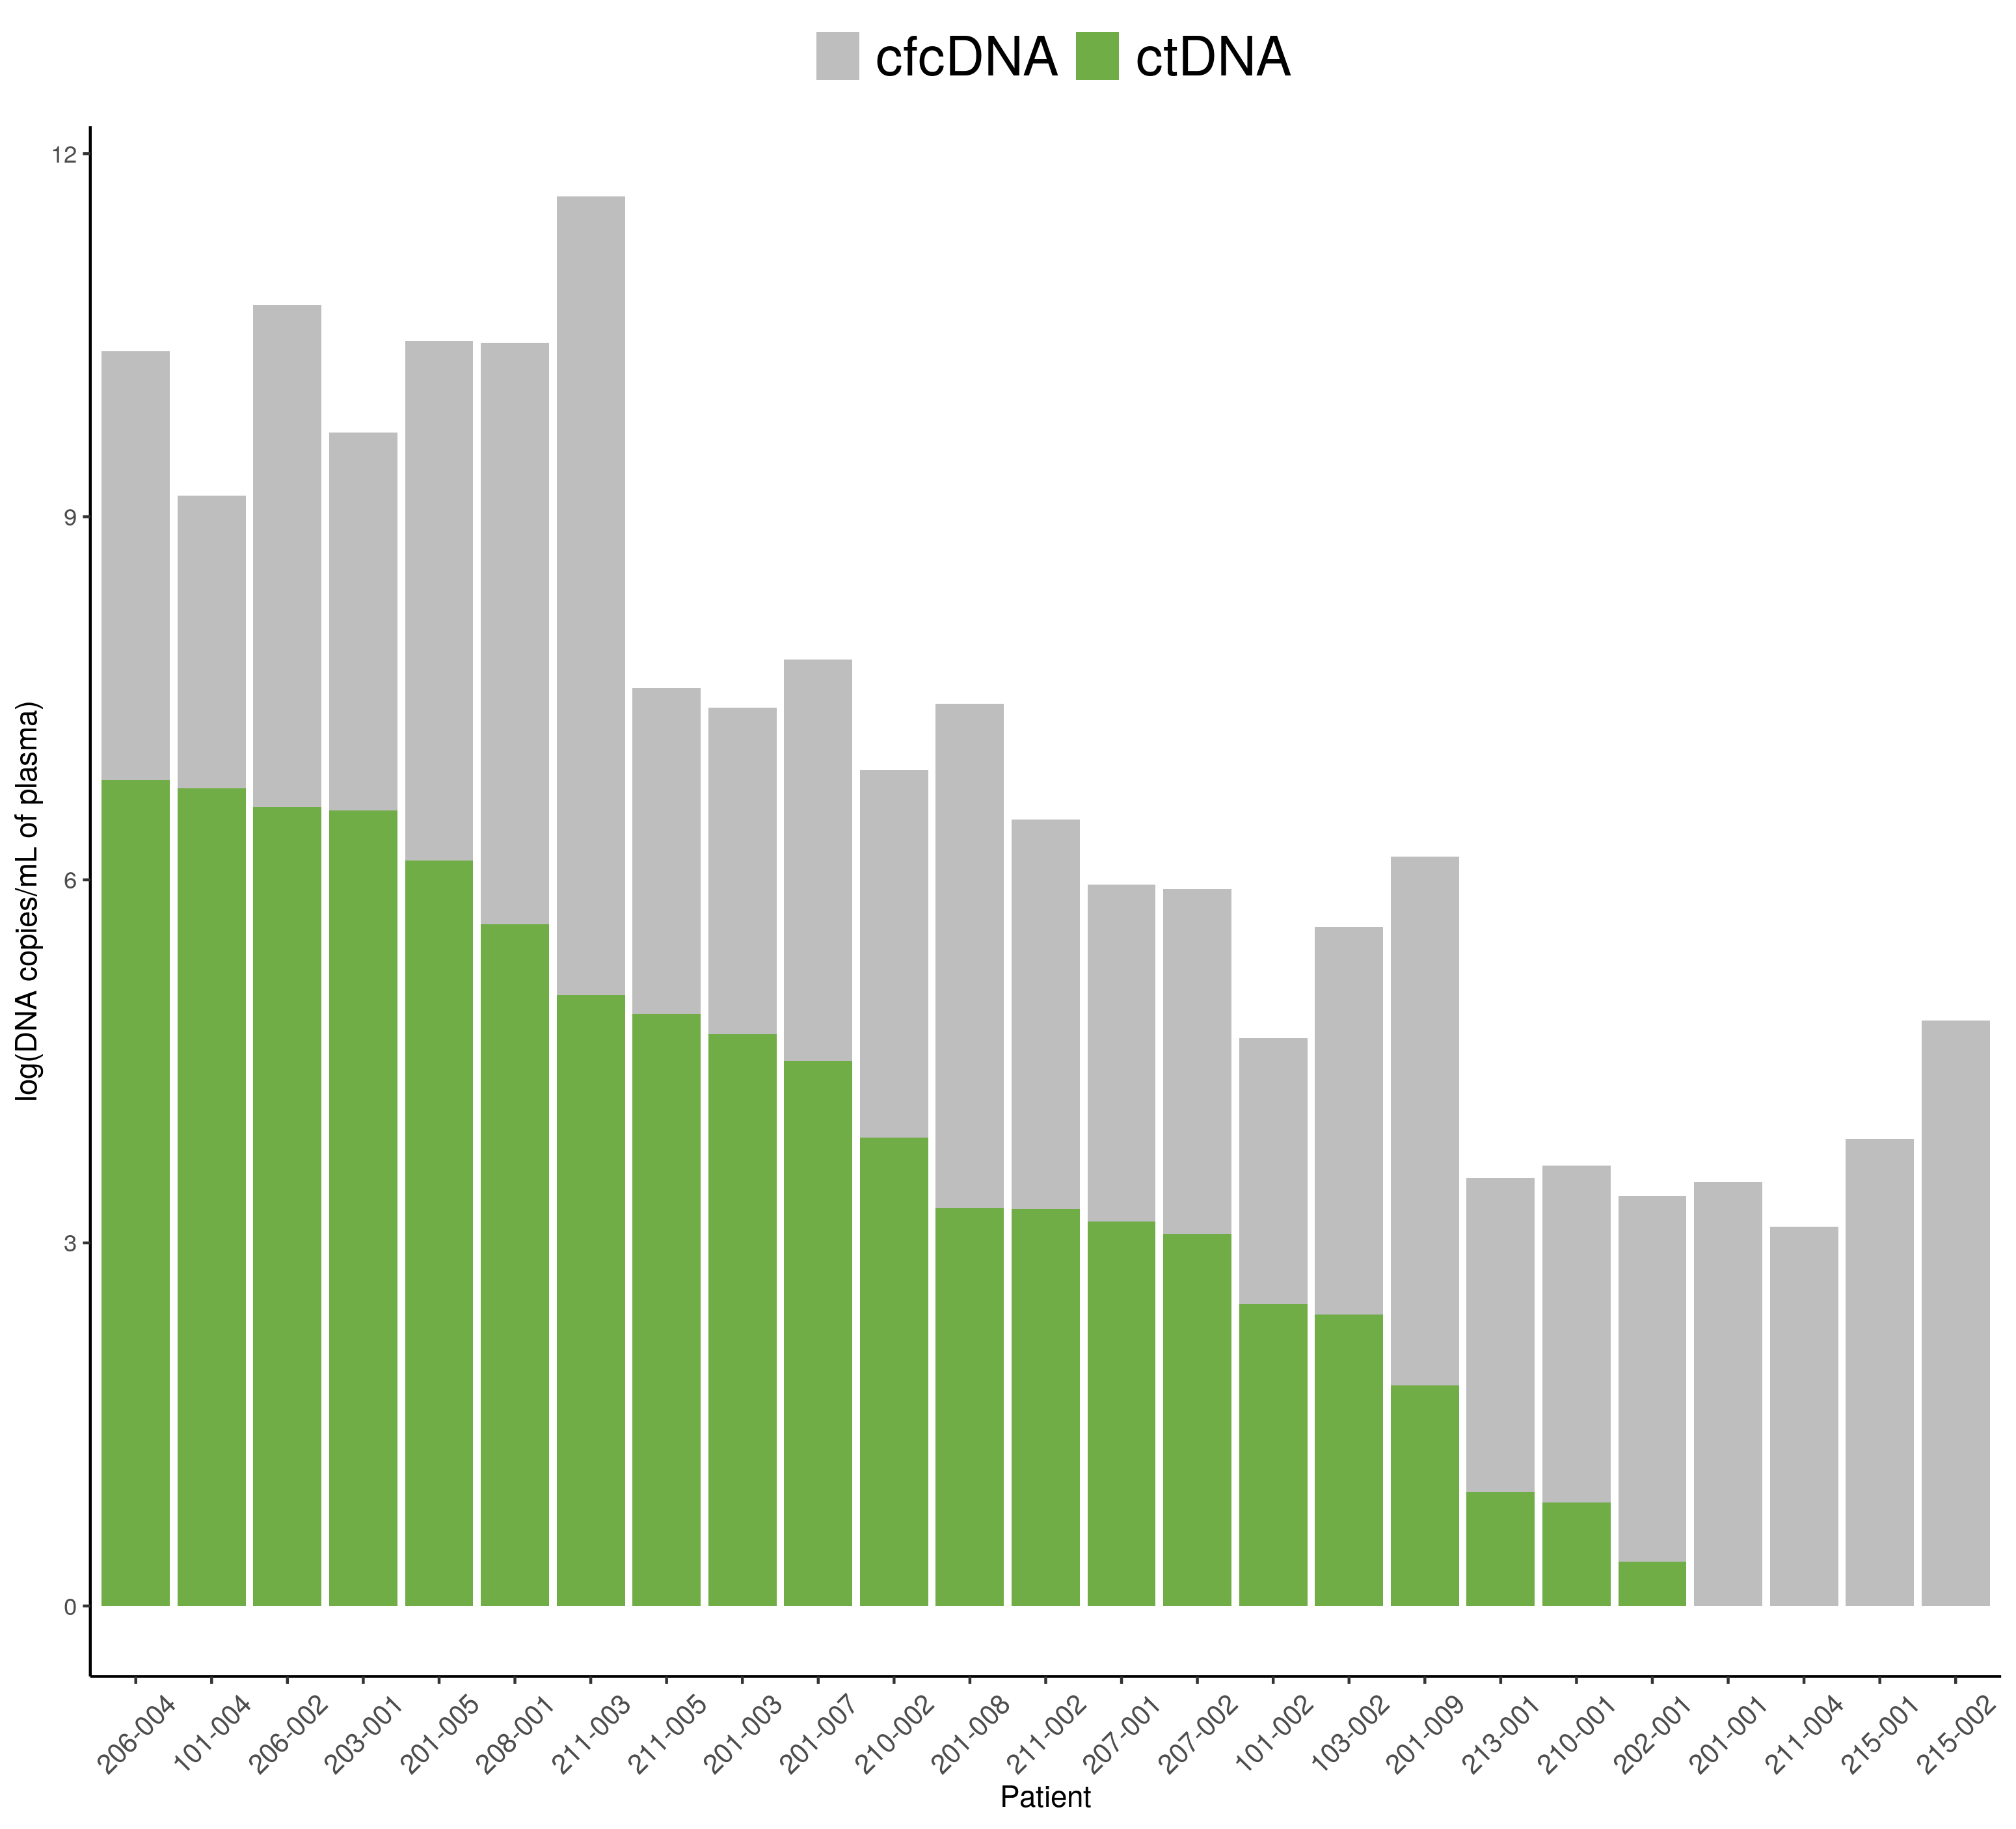


Abbreviations: cfc-DNA: Cell-free circulating DNA; ctDNA: Circulating tumor DNA.

Note: cfcDNA, (corresponding to mutant and wild-type copies) was detected in 100% (25 out of 25) of patients whereas ctDNA (corresponding to mutant copies) was detected in 84.0% (21 out of 25) of patients considering the mutation with the highest allelic frequency per patient.
